# Supplementary material for: Systemic glucocorticoids and the risk of breast cancer in a large nationwide case–control study
Source: Springer Nature journal article supplement (doi:10.1186/s13058-025-02071-0), 2025-06-23
Supplement: MOESM1 [file 13058_2025_2071_MOESM1_ESM.pdf]

# Supplementary Material

*Systemic glucocorticoids and the risk of breast cancer in a large nationwide case-control study*

*Cairat et al*

## Table of Contents

|            |                                                                                                                                                                                                    |      |
|------------|----------------------------------------------------------------------------------------------------------------------------------------------------------------------------------------------------|------|
| Table S1   | Table S1. Associations of systemic glucocorticoid use with risk of breast cancer, stratified by age at index date.                                                                                 | Pg 2 |
| Table S2   | Associations of systemic glucocorticoid use with risk of breast cancer by histological type                                                                                                        | Pg 3 |
| Table S3   | Association between systemic glucocorticoid use and invasive breast cancer risk with exposure with no lag period, 1-year lag and 2-year lag.                                                       | Pg 4 |
| Table S4   | Associations between systemic glucocorticoid use and breast cancer risk restricted to women with a diagnosis of rheumatoid arthritis and to women with a diagnosis of inflammatory bowel diseases. | Pg 5 |
| Appendix 1 | Danish Nationwide Health Registries                                                                                                                                                                | Pg 6 |
| Appendix 2 | Codes and definitions                                                                                                                                                                              | Pg 7 |

**Table S1. Associations of systemic glucocorticoid use with risk of breast cancer, stratified by age at index date.**

|                        | Age <55 years |            |                          | Age ≥55 and <70 years |            |                          | Age ≥70 years |            |                          | <i>P</i> <sub>heterogeneity</sub> |
|------------------------|---------------|------------|--------------------------|-----------------------|------------|--------------------------|---------------|------------|--------------------------|-----------------------------------|
|                        | n case        | n controls | OR (95% CI) <sup>1</sup> | n case                | n controls | OR (95% CI) <sup>1</sup> | n case        | n controls | OR (95% CI) <sup>1</sup> |                                   |
| <b>Use categories</b>  |               |            |                          |                       |            |                          |               |            |                          |                                   |
| Never use              | 18,409        | 183,125    | 1.00 (ref.)              | 26,365                | 264,868    | 1.00 (ref.)              | 15,094        | 150,981    | 1.00 (ref.)              |                                   |
| Ever use               | 1,399         | 14,955     | 0.95 (0.89-1.01)         | 3,581                 | 34,592     | 1.03 (0.99-1.07)         | 2,981         | 29,769     | 1.00 (0.95-1.04)         | 0.10                              |
| Long-term use          | 37            | 543        | 0.69 (0.49-0.99)         | 143                   | 1,743      | 0.79 (0.65-0.95)         | 259           | 2,849      | 0.97 (0.82-1.14)         | 0.11                              |
| <b>Cumulative DDDs</b> |               |            |                          |                       |            |                          |               |            |                          |                                   |
| Never use              | 18,409        | 183,125    | 1.00 (ref.)              | 26,365                | 264,868    | 1.00 (ref.)              | 15,094        | 150,981    | 1.00 (ref.)              |                                   |
| <500                   | 1,283         | 13,603     | 0.95 (0.90-1.01)         | 3,225                 | 30,491     | 1.04 (1.00-1.09)         | 2,397         | 23,337     | 1.01 (0.96-1.06)         |                                   |
| ≥500 - <1000           | 79            | 809        | 1.01 (0.79-1.28)         | 213                   | 2,358      | 0.88 (0.76-1.01)         | 325           | 3,583      | 0.93 (0.83-1.06)         |                                   |
| ≥1000 - <1500          | 21            | 269        | 0.81 (0.52-1.28)         | 71                    | 799        | 0.86 (0.67-1.11)         | 117           | 1,373      | 0.89 (0.73-1.09)         |                                   |
| ≥1500                  | 16            | 274        | 0.62 (0.37-1.04)         | 72                    | 944        | 0.75 (0.59-0.96)         | 142           | 1,476      | 1.03 (0.86-1.24)         |                                   |
| <i>OR per 500 DDDs</i> | 1,399         | 14,955     | 0.92 (0.84-1.00)         | 3,581                 | 34,592     | 0.94 (0.90-0.98)         | 2,981         | 29,769     | 0.99 (0.95-1.03)         | 0.11                              |

Abbreviations: CI, confidence interval; DDD, defined daily dose; OR, Odds ratio.

<sup>1</sup> Adjusted for age, calendar time (by risk-set matching and the conditional analysis), asthma, rheumatoid arthritis, polymyalgia rheumatica/ giant cell arthritis, psoriasis arthritis, ankylosing spondylitis, Crohn's disease, ulcerative colitis, renal diseases, multiple sclerosis, Charlson comorbidity index score, ever use of immunosuppressants, ever use of non-steroidal anti-inflammatory drugs, ever use of proton pump inhibitors, former and recent use of oral contraceptives and former and recent use of hormone replacement therapy .

**Table S2. Associations of systemic glucocorticoid use with risk of breast cancer by histological type.**

|                        | Ductal adenocarcinoma |            |                          | Lobular adenocarcinoma |            |                          | Other histologies |            |                          | <i>P<sub>heterogeneity</sub></i> |
|------------------------|-----------------------|------------|--------------------------|------------------------|------------|--------------------------|-------------------|------------|--------------------------|----------------------------------|
|                        | n case                | n controls | OR (95% CI) <sup>1</sup> | n case                 | n controls | OR (95% CI) <sup>1</sup> | n case            | n controls | OR (95% CI) <sup>1</sup> |                                  |
| <b>Use categories</b>  |                       |            |                          |                        |            |                          |                   |            |                          |                                  |
| Never use              | 45,044                | 450,533    | 1.00 (ref.)              | 7,596                  | 75,938     | 1.00 (ref.)              | 7,228             | 72,503     | 1.00 (ref.)              |                                  |
| Ever use               | 5,805                 | 57,957     | 1.00 (0.97-1.03)         | 1,075                  | 10,772     | 1.01 (0.94-1.09)         | 1,081             | 10,587     | 1.03 (0.96-1.11)         | 0.72                             |
| Long-term use          | 297                   | 3,593      | 0.80 (0.70-0.92)         | 54                     | 749        | 0.81 (0.59-1.13)         | 88                | 793        | 1.25 (0.96-1.63)         | 0.04                             |
| <b>Cumulative DDDs</b> |                       |            |                          |                        |            |                          |                   |            |                          |                                  |
| Never use              | 45,044                | 450,533    | 1.00 (ref.)              | 7,596                  | 75,938     | 1.00 (ref.)              | 7,228             | 72,503     | 1.00 (ref.)              |                                  |
| <500                   | 5,078                 | 49,570     | 1.01 (0.98-1.05)         | 945                    | 9,108      | 1.03 (0.96-1.11)         | 882               | 8,753      | 1.02 (0.94-1.10)         |                                  |
| ≥500 - <1000           | 430                   | 4,794      | 0.89 (0.80-0.99)         | 76                     | 915        | 0.87 (0.68-1.11)         | 111               | 1,041      | 1.12 (0.91-1.39)         |                                  |
| ≥1000 - <1500          | 149                   | 1,692      | 0.88 (0.74-1.05)         | 25                     | 353        | 0.76 (0.50-1.16)         | 35                | 396        | 0.94 (0.65-1.35)         |                                  |
| ≥1500                  | 148                   | 1,901      | 0.79 (0.66-0.94)         | 29                     | 396        | 0.82 (0.55-1.22)         | 53                | 397        | 1.40 (1.03-1.91)         |                                  |
| <i>OR per 500 DDDs</i> | 5,805                 | 57,957     | 0.94 (0.91-0.97)         | 1,075                  | 10,772     | 0.94 (0.87-1.02)         | 1,081             | 10,587     | 1.07 (1.01-1.14)         | <0.01                            |

Abbreviations: CI, confidence interval; DDD, defined daily dose; OR, Odds ratio.

<sup>1</sup> Adjusted for age, calendar time (by risk-set matching and the conditional analysis), asthma, rheumatoid arthritis, polymyalgia rheumatica/ giant cell arthritis, psoriasis arthritis, ankylosing spondylitis, Crohn's disease, ulcerative colitis, renal diseases, multiple sclerosis, Charlson comorbidity index score, ever use of immunosuppressants, ever use of non-steroidal anti-inflammatory drugs, ever use of proton pump inhibitors, former and recent use of oral contraceptives and former and recent use of hormone replacement therapy..

**Table S3. Association between systemic glucocorticoid use and invasive breast cancer risk with exposure with no lag period, 1-year lag and 2-year lag.**

|                                     | Lag 0 year |            |                          | Lag 1 year |            |                          | Lag 2 years |            |                          |
|-------------------------------------|------------|------------|--------------------------|------------|------------|--------------------------|-------------|------------|--------------------------|
|                                     | n case     | n controls | OR (95% CI) <sup>1</sup> | n case     | n controls | OR (95% CI) <sup>1</sup> | n case      | n controls | OR (95% CI) <sup>1</sup> |
| <b>All systemic glucocorticoids</b> |            |            |                          |            |            |                          |             |            |                          |
| Ever use                            | 8,661      | 86,247     | 1.00 (0.98-1.03)         | 7,961      | 79,316     | 1.00 (0.98-1.03)         | 7,250       | 72,433     | 1.00 (0.97-1.03)         |
| Long-term use                       | 517        | 6,037      | 0.87 (0.78-0.97)         | 439        | 5,135      | 0.87 (0.77-0.97)         | 377         | 4,355      | 0.88 (0.78-1.00)         |
| <b>Cumulative DDDs</b>              |            |            |                          |            |            |                          |             |            |                          |
| Never use                           | 59,168     | 592,043    | 1.00 (ref.)              | 59,868     | 598,974    | 1.00 (ref.)              | 60,579      | 605,857    | 1.00 (ref.)              |
| <500                                | 7,443      | 72,630     | 1.02 (0.99-1.04)         | 6,905      | 67,431     | 1.02 (0.99-1.04)         | 6,338       | 62,102     | 1.01 (0.98-1.04)         |
| 500-1000                            | 701        | 7,580      | 0.93 (0.86-1.01)         | 617        | 6,750      | 0.92 (0.85-1.01)         | 535         | 5,976      | 0.91 (0.83-1.00)         |
| 1000-1500                           | 247        | 2,836      | 0.88 (0.77-1.01)         | 209        | 2,441      | 0.87 (0.75-1.01)         | 185         | 2,132      | 0.89 (0.76-1.04)         |
| >1500                               | 270        | 3,201      | 0.86 (0.76-0.98)         | 230        | 2,694      | 0.88 (0.76-1.01)         | 192         | 2,223      | 0.89 (0.77-1.04)         |
| OR per 500 DDDs                     | 8,661      | 86,247     | 0.96 (0.94-0.99)         | 7,961      | 79,316     | 0.96 (0.94-0.99)         | 7,250       | 72,433     | 0.97 (0.94-1.00)         |

Abbreviations: OR, Odds ratio; CI, confidence interval; DDD, defined daily dose

<sup>1</sup> Adjusted for age, calendar time (by risk-set matching and the conditional analysis), asthma, rheumatoid arthritis, polymyalgia rheumatica/ giant cell arthritis, psoriasis arthritis, ankylosing spondylitis, Crohn's disease, ulcerative colitis, renal diseases, multiple sclerosis, Charlson comorbidity index score, ever use of immunosuppressants, ever use of non-steroidal anti-inflammatory drugs, ever use of proton pump inhibitors, former and recent use of oral contraceptives and former and recent use of hormone replacement therapy..

**Table S4. Associations between systemic glucocorticoid use and breast cancer risk restricted to women with a diagnosis of rheumatoid arthritis and to women with a diagnosis of inflammatory bowel diseases**

|                                                     | n case/control | n case/control | OR (95% CI) <sup>1</sup> |
|-----------------------------------------------------|----------------|----------------|--------------------------|
| <b>Among women with rheumatoid arthritis</b>        |                |                |                          |
| <b>Use categories</b>                               |                |                |                          |
| Never use                                           | 486            | 5,096          | 1.00 (ref)               |
| Ever use                                            | 386            | 3,624          | 0.96 (0.82-1.12)         |
| Long-term use                                       | 61             | 656            | 0.86 (0.62-1.20)         |
| <b>Cumulative DDDs</b>                              |                |                |                          |
| Never use                                           | 486            | 5,096          | 1.00 (ref)               |
| <500                                                | 262            | 2,352          | 1.00 (0.84-1.18)         |
| ≥500 - <1000                                        | 63             | 616            | 0.88 (0.66-1.18)         |
| ≥1000 - <1500                                       | 25             | 279            | 0.82 (0.53-1.26)         |
| ≥1500                                               | 36             | 377            | 0.86 (0.59-1.26)         |
| OR per 500 DDDs                                     | 386            | 3,624          | 0.95 (0.87-1.03)         |
| <b>Among women with inflammatory bowel diseases</b> |                |                |                          |
| <b>Use categories</b>                               |                |                |                          |
| Never use                                           | 446            | 4,459          | 1.00 (ref)               |
| Ever use                                            | 231            | 2,311          | 0.92 (0.76-1.11)         |
| Long-term use                                       | 22             | 282            | 0.70 (0.39-1.25)         |
| <b>Cumulative DDDs</b>                              |                |                |                          |
| Never use                                           | 446            | 4,459          | 1.00 (ref)               |
| <500                                                | 165            | 1,544          | 0.96 (0.78-1.17)         |
| ≥500 - <1000                                        | 44             | 485            | 0.81 (0.56-1.16)         |
| ≥1000 - <1500                                       | 9              | 152            | 0.55 (0.27-1.12)         |
| ≥1500                                               | 13             | 130            | 1.04 (0.56-1.96)         |
| OR per 500 DDDs                                     | 231            | 2,311          | 0.92 (0.80-1.05)         |

Abbreviations: CI, confidence interval; DDD, defined daily dose; OR, Odds ratio.

<sup>1</sup> Adjusted for age and calendar time (by risk-set matching and the conditional analysis).

<sup>2</sup> Adjusted for age, calendar time (by risk-set matching and the conditional analysis), asthma, rheumatoid arthritis, polymyalgia rheumatica/ giant cell arthritis, psoriasis arthritis, ankylosing spondylitis, Crohn's disease, ulcerative colitis, renal diseases, multiple sclerosis, Charlson comorbidity index score, ever use of immunosuppressants, ever use of non-steroidal anti-inflammatory drugs, ever use of proton pump inhibitors, former and recent use of oral contraceptives and former and recent use of hormone replacement therapy. .

## Appendix 1 – Danish Nationwide Health Registries

The **Danish Cancer Registry** has recorded incident cases of cancer on a nationwide basis since 1943 and provides accurate and almost complete records of cancer cases in Denmark. Cancer diagnoses are coded according to the *International Classification of Diseases, Tenth Revision* 10 (ICD-10) and the ICD for Oncology (ICD-O-1-3) for topography and morphology (26).

The **Danish Pathology Register** contains records of pathological specimens, which for some departments dates back as early as 1970 (30). Since 1990, all departments of pathology have used electronic registrations and from 1997, it became a legal obligation to report the pathologies to the Danish Pathology Register. The registry contains coded diagnoses based on the Danish Systematized Nomenclature of Medicine (SNOMED).

The **Danish National Prescription Registry** contains data on all prescription drugs filled by Danish residents since 1995. The data include the type of drug, date of filling, and quantity (27). The dosing information and the indication for prescribing are not available and no information is available on drugs used at hospital level. Drugs are categorized according to the Anatomic Therapeutic Chemical (ATC) index, a hierarchical classification system developed by the World Health Organization, and the quantity dispensed for each prescription is described by the number and strength of the pharmaceutical entities (e.g., tablets), as well as defined daily doses (DDD).

The **Danish National Patient Registry** contains nationwide data on all non-psychiatric hospital admissions since 1977 and on ambulatory hospital contacts and psychiatric admissions since 1995 (28). Discharge/contact diagnoses have been coded according to ICD-8 from 1977 to 1993 and ICD-10 since 1994.

Statistics Denmark is a governmental institution that collects and processes information for a variety of statistical and scientific purposes, e.g. education and income. It hosts the **Population Education Registry**, which contains information on nearly all adult Danes and provides the highest completed level of education, defined as the longest duration of schooling (29).

The Danish **Civil Registration System** contains data on addresses, migration, and date of death (31,32). This system allowed us to extract population controls and to keep track of all subjects during the study period.

## Appendix 2– Codes and definitions

| <b>Breast cancer diagnosis, morphology and stage</b>                   |                        |                                                                                                                                                                                                                                                                                                                                                                                                        |
|------------------------------------------------------------------------|------------------------|--------------------------------------------------------------------------------------------------------------------------------------------------------------------------------------------------------------------------------------------------------------------------------------------------------------------------------------------------------------------------------------------------------|
| <b>Breast cancer cases</b>                                             | <i>ICD-10</i>          | C50.0-C50.9                                                                                                                                                                                                                                                                                                                                                                                            |
| <b>Histological subtype</b>                                            |                        |                                                                                                                                                                                                                                                                                                                                                                                                        |
| Ductal adenocarcinoma                                                  | <i>Morphology code</i> | 85003, 85013, 85023, 85033, 85043, 85073, 85213, 85403, 85413                                                                                                                                                                                                                                                                                                                                          |
| Lobular adenocarcinoma                                                 | <i>Morphology code</i> | 85203, 85223                                                                                                                                                                                                                                                                                                                                                                                           |
| Other                                                                  | <i>Morphology code</i> | 81403, 82003, 82013, 82113, 82303, 82463, 82603, 83103, 83153, 84013, 84413, 84503, 84803, 84813, 84903, 85103, 85303, 85503, 85603, 85703, 85723, 85733, 85753, 80103, 80123, 80133, 80203, 80213, 80223, 80413, 80463, 80503, 80703, 80743, 80003, 80013, 87203, 88003, 88103, 88303, 88903, 89343, 89403, 89803, 89823, 90103, 90203, 91203, 91303, 95903, 95913, 96703, 96733, 96803, 96903, 97023 |
| <b>Stage</b>                                                           |                        |                                                                                                                                                                                                                                                                                                                                                                                                        |
| Localized                                                              | <i>TNM</i>             | (T=11-19 & N=30 & M=40) or (T=11-13 & [N=30 or N=39] & [M=40 or M=49]) or (T=14 & N=30 & M=49) or (T=14 & N=39 & M=40)                                                                                                                                                                                                                                                                                 |
| Non localized                                                          | <i>TNM</i>             | (T=11-19 & N=31-33) or M=41                                                                                                                                                                                                                                                                                                                                                                            |
| Others                                                                 | <i>TNM</i>             | (T=19 & N=39 & M=49) or none of the above                                                                                                                                                                                                                                                                                                                                                              |
| <b>ER status</b>                                                       |                        |                                                                                                                                                                                                                                                                                                                                                                                                        |
| ER+                                                                    | Pathology code         | F29521, FYY501                                                                                                                                                                                                                                                                                                                                                                                         |
| ER-                                                                    | Pathology code         | F29525, FYY505                                                                                                                                                                                                                                                                                                                                                                                         |
| <b>Exclusion criteria</b>                                              |                        |                                                                                                                                                                                                                                                                                                                                                                                                        |
| Any cancer (except non-melanoma skin cancer)                           | <i>ICD-10</i>          | C00-97 (except C44)                                                                                                                                                                                                                                                                                                                                                                                    |
| Mastectomy                                                             | <i>NCSP-code</i>       | KHAC                                                                                                                                                                                                                                                                                                                                                                                                   |
| <b>Systemic glucocorticoids</b>                                        |                        | H02AB                                                                                                                                                                                                                                                                                                                                                                                                  |
| Betamethasone                                                          | <i>ATC code</i>        | H02AB01                                                                                                                                                                                                                                                                                                                                                                                                |
| Dexamethasone                                                          | <i>ATC code</i>        | H02AB02                                                                                                                                                                                                                                                                                                                                                                                                |
| Methylprednisolone                                                     | <i>ATC code</i>        | H02AB04                                                                                                                                                                                                                                                                                                                                                                                                |
| Prednisolone                                                           | <i>ATC code</i>        | H02AB06                                                                                                                                                                                                                                                                                                                                                                                                |
| Prednisone                                                             | <i>ATC code</i>        | H02AB07                                                                                                                                                                                                                                                                                                                                                                                                |
| Triamcinolone                                                          | <i>ATC code</i>        | H02AB08                                                                                                                                                                                                                                                                                                                                                                                                |
| Hydrocortisone                                                         | <i>ATC code</i>        | H02AB09                                                                                                                                                                                                                                                                                                                                                                                                |
| <b>Other drugs</b>                                                     |                        |                                                                                                                                                                                                                                                                                                                                                                                                        |
| Immunosuppressants                                                     | <i>ATC code</i>        | L04                                                                                                                                                                                                                                                                                                                                                                                                    |
| Nonsteroidal anti-inflammatory drugs                                   | <i>ATC code</i>        | M01A                                                                                                                                                                                                                                                                                                                                                                                                   |
| Proton pump inhibitors                                                 | <i>ATC code</i>        | A02BC02                                                                                                                                                                                                                                                                                                                                                                                                |
| Hormone replacement therapy excluding vaginally administered estrogens | <i>ATC code</i>        | G03C, G03F, G03HB01 (excluding vaginally administered estrogens)                                                                                                                                                                                                                                                                                                                                       |
| Raloxifen                                                              |                        | G03XC01                                                                                                                                                                                                                                                                                                                                                                                                |
| Oral contraceptives                                                    | <i>ATC code</i>        | G03A                                                                                                                                                                                                                                                                                                                                                                                                   |
| <b>Prior diagnoses (diagnostic code or drug marker)</b>                |                        |                                                                                                                                                                                                                                                                                                                                                                                                        |
| Alcohol-related diseases (proxy of heavy alcohol consumption)          | <i>ICD-8</i>           | 291, 303, 425.5, 537.5, 571.0, 571.1, 571.2, 571.3, 577.10                                                                                                                                                                                                                                                                                                                                             |
|                                                                        | <i>ICD-10</i>          | F10, E244, G312, G621, G721, I426, K292, K70, K852, K860, Q860, Z502 Z714, Z721                                                                                                                                                                                                                                                                                                                        |
|                                                                        | <i>ATC code</i>        | N07BB                                                                                                                                                                                                                                                                                                                                                                                                  |
| Asthma                                                                 | <i>ICD-8</i>           | 493                                                                                                                                                                                                                                                                                                                                                                                                    |
|                                                                        | <i>ICD-10</i>          | J45, J46                                                                                                                                                                                                                                                                                                                                                                                               |
| Chronic obstructive pulmonary disease                                  | <i>ICD-8</i>           | 491,492                                                                                                                                                                                                                                                                                                                                                                                                |
|                                                                        | <i>ICD-10</i>          | J41–J44                                                                                                                                                                                                                                                                                                                                                                                                |
|                                                                        | <i>ATC code</i>        | R03BB, R03AC                                                                                                                                                                                                                                                                                                                                                                                           |
| Rheumatoid arthritis                                                   | <i>ICD-8</i>           | 712.0 712.1, 712.2, 712.3 712.5                                                                                                                                                                                                                                                                                                                                                                        |
|                                                                        | <i>ICD-10</i>          | M05-M06                                                                                                                                                                                                                                                                                                                                                                                                |
| Polymyalgia rheumatica/ Giant cell arthritis                           | <i>ICD-8</i>           | 446.30, 446.31, 446.39                                                                                                                                                                                                                                                                                                                                                                                 |

|                          |                 |                                                                                                                                                        |
|--------------------------|-----------------|--------------------------------------------------------------------------------------------------------------------------------------------------------|
| Psoriasis arthritis      | ICD-10          | M315, M316, M35.3                                                                                                                                      |
|                          | ICD-8           | 696.09                                                                                                                                                 |
| Ankylosing spondylitis   | ICD-10          | M07.0-M07.3                                                                                                                                            |
|                          | ICD-8           | 712.4                                                                                                                                                  |
| Crohn's disease          | ICD-10          | M45                                                                                                                                                    |
|                          | ICD-8           | 563.01, 563.02, 563.09                                                                                                                                 |
| Ulcerative colitis       | ICD-10          | K50                                                                                                                                                    |
|                          | ICD-8           | 563.1                                                                                                                                                  |
| Renal diseases           | ICD-10          | K51                                                                                                                                                    |
|                          | ICD-8           | 249.02, 250.02, 403, 404, 580-584, 590.09, 593.20, 753.10-753.19                                                                                       |
|                          | ICD-10          | N00, N01, N03, N04, N05 N06, N07, N08, N11, N14, N15, N16, N17, N18, N19, N26, N27, N28, N29, I12, I13, I15.0, I15.1, E10.2, E11.2, E14.2, Q61.1-Q61.4 |
| Multiple sclerosis       | ICD-8           | 340                                                                                                                                                    |
|                          | ICD-10          | G35                                                                                                                                                    |
| Adrenal insufficiency    | ICD-8           | 253, 255.10, 255.11                                                                                                                                    |
|                          | ICD-10          | E23.0, E24.0, E27.1, E27.2, E27.4, E89.3                                                                                                               |
| <b>Educational level</b> |                 |                                                                                                                                                        |
| Basic                    | <i>Duration</i> | 7-10 years                                                                                                                                             |
| Medium                   | <i>Duration</i> | 11–12 years                                                                                                                                            |
| Higher                   | <i>Duration</i> | ≥13 years                                                                                                                                              |
| Unknown                  | <i>Duration</i> | -                                                                                                                                                      |

**NOTES:**

ICD = International Classification of Disease

ATC = Anatomical Therapeutic Chemical

NCSP = Nordic Classification of Surgical procedures

ER= Estrogen Receptor
